# Supplementary material for: Development of a Chemical Cocktail That Rescues Mouse Brain Demyelination in a Cuprizone-Induced Model
Source: MDPI journal article supplement (doi:10.3390/cells11071091), 2022-03-24
Supplement: s1 [file s1]

**Table S1:** Cell culture reagents used in this study

| Chemicals & Media   | Company           | Catalogue |
|---------------------|-------------------|-----------|
| Y-27632 (ROCKi)     | LC Laboratories   | Y-5301    |
| SU9516 (Cdk)        | R&D Systems       | 2907      |
| Forskolin (FSK)     | Tocris            | 1099      |
| Valproic acid (VPA) | Tocris            | 2815      |
| bFGF                | Pepro Tech        | 100-18B   |
| EGF                 | Pepro Tech        | AF-100-15 |
| PDGFAA              | Pepro Tech        | 100-13A   |
| NT3                 | Pepro Tech        | 450-03    |
| DMEM                | Life Technologies | 11965-084 |
| DMEM/F12            | Life Technologies | 11320-033 |
| N2 supplement       | Life Technologies | 17502-048 |
| B27 supplement      | Life Technologies | 17504-044 |
| Accutase            | Innovative Cell   | AT-104    |
| Trypsin             | Life Technologies | 15400-054 |

**Table S2:** Chemical compounds used to induce OLCs from fibroblasts

| Name          | Mechanism                     | Source          | Concentration | Structure                                                                             |
|---------------|-------------------------------|-----------------|---------------|---------------------------------------------------------------------------------------|
| Valproic acid | Histone deacetylase inhibitor | TOCRIS          | 3 mM          | 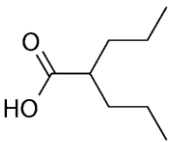  |
| Y-27632       | ROCK inhibitor                | LC Laboratories | 10 $\mu$ M    |  |
| Forskolin     | cAMP activator                | TOCRIS          | 10 $\mu$ M    |  |
| SU9516        | CDK inhibitor                 | R&D Systems     | 10 $\mu$ M    |  |

**Table S3:** Antibody list for immunofluorescence, western blotting and flow cytometry

| <b>Antibody</b>            | <b>Company</b>    | <b>Catalogue</b> |
|----------------------------|-------------------|------------------|
| Olig2-antibody             | Millipore         | AB9610           |
| O4-antibody                | Millipore         | MAB345           |
| MBP-antibody               | Proteintech       | 10458-1-AP       |
| PDGFRa-antibody            | R&D Systems       | MAB322           |
| GalC-antibody              | Proteintech       | 11991-1-AP       |
| GPR17-antibody             | Proteintech       | 13416-1-AP       |
| O1-antibody                | Millipore         | MAB344           |
| Nkx2.2-antibody            | Proteintech       | 13013-1-AP       |
| Myelin PLP-antibody        | Abcam             | AB28486          |
| DAPI                       | Life Technologies | D1306            |
| Goat anti-mouse IgM CF555  | Life Technologies | A-21426          |
| Goat anti-mouse IgG CF488  | Biotium           | 20018            |
| Goat anti-mouse IgG CF555  | Life Technologies | A21424           |
| Goat anti-rat IgG CF555    | Life Technologies | A21434           |
| Goat anti-rabbit IgG CF488 | Biotium           | 20019            |
| Goat anti-rabbit IgG CF555 | Life Technologies | A21429           |
| Anti-A2B5-APC              | Miltenyi Biotec   | 130-093-582      |

**Table S4:** List of primers used in qRT-PCR written 5'-to-3'

| <b>Primer</b> | <b>Sequence</b>                 |
|---------------|---------------------------------|
| MBP-F         | TGG TGA TGG AGA TGT CAA GCA GGT |
| MBP-R         | GCT GTG GTT TGG AAA CGA GGT TGT |
| PLP-F         | CCA GAG GCC AAC ATC AAG CT      |
| PLP-R         | TCG GGA TGT CCT AGC CAT TT      |
| GAPDH-F       | CCA CTC CTC CAC CTT TGA CG      |
| GAPDH-R       | CCA CCA CCC TGT TGC TGT AG      |

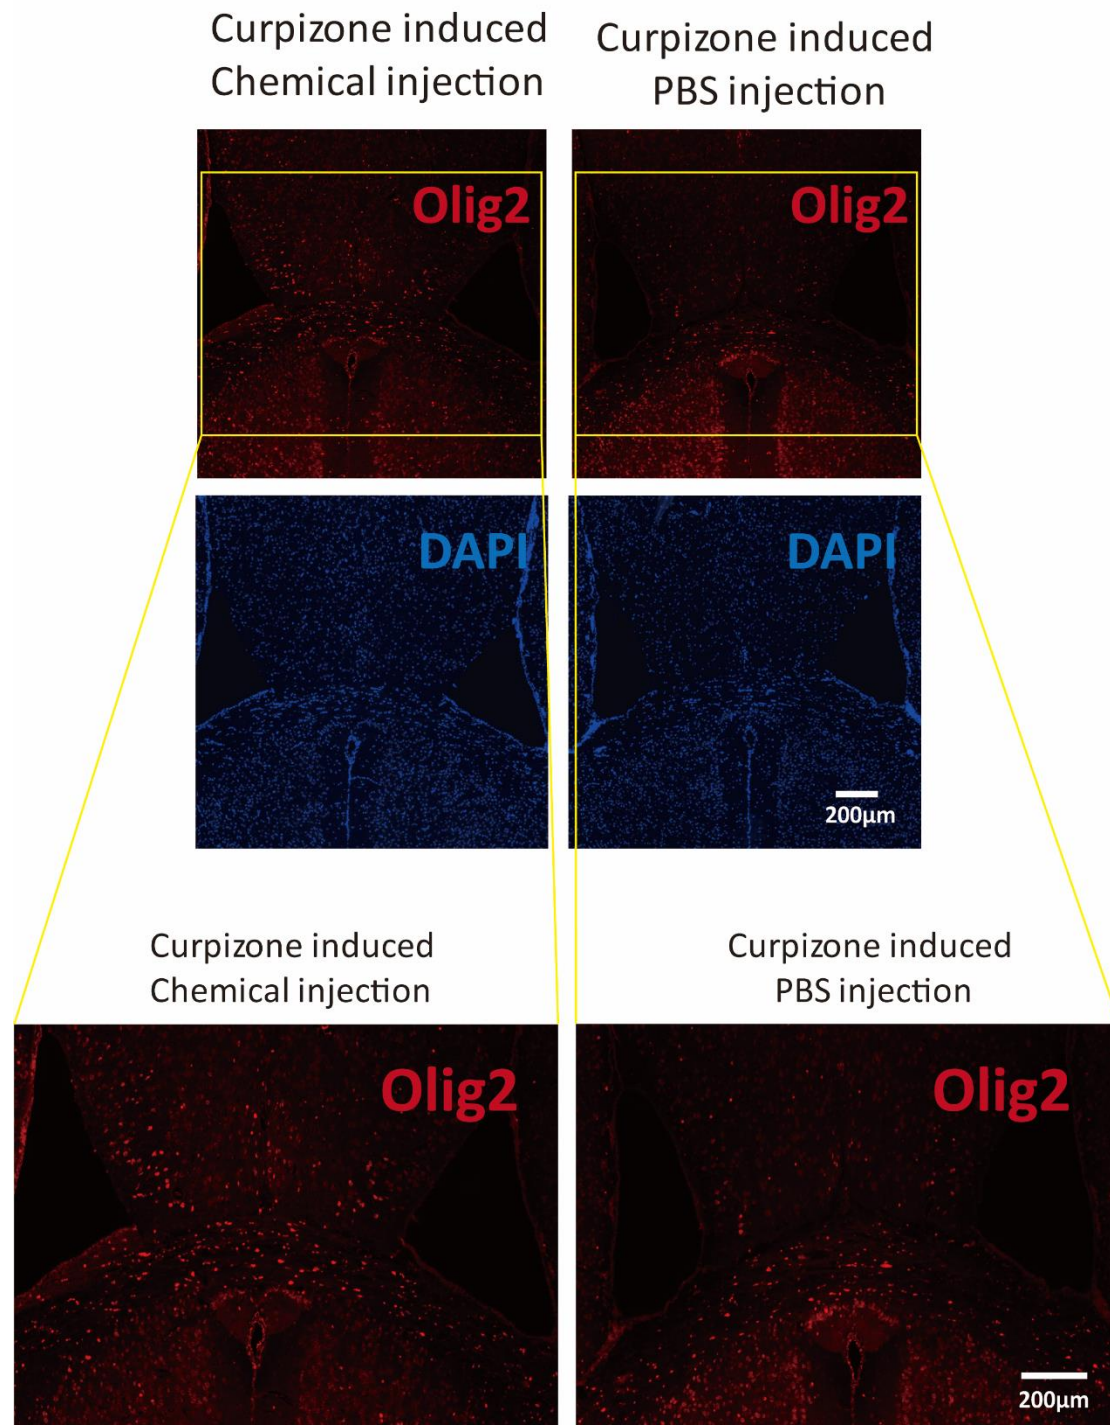

**Figure S1.** 3 chemical (3C) cocktail injection restored Olig2 expression in mice. Induction of demyelination in B6 mice by cuprizone. The YSF-cocktail or PBS was injected directly into the corpus callosum of mice. Then the mice were allowed to recover for two weeks before dissection. YSF refers to Y27632, SU9516 and forskolin. After 2 weeks of recovery, immunofluorescence staining was performed to observe the Olig2 (red) protein expression of the YSF-cocktail and PBS-injected groups. DAPI (blue) was used to stain nuclei.
